# Supplementary material for: Joint Degradation in a Monkey Model of Collagen-Induced Arthritis: Role of Cathepsin K Based on Biochemical Markers and Histological Evaluation
Source: PubMed Central journal article supplement (PMC4754492; doi:10.1155/2016/8938916), 2016-02-02
Supplement: 8938916.f1.pdf [file 8938916.f1.pdf]

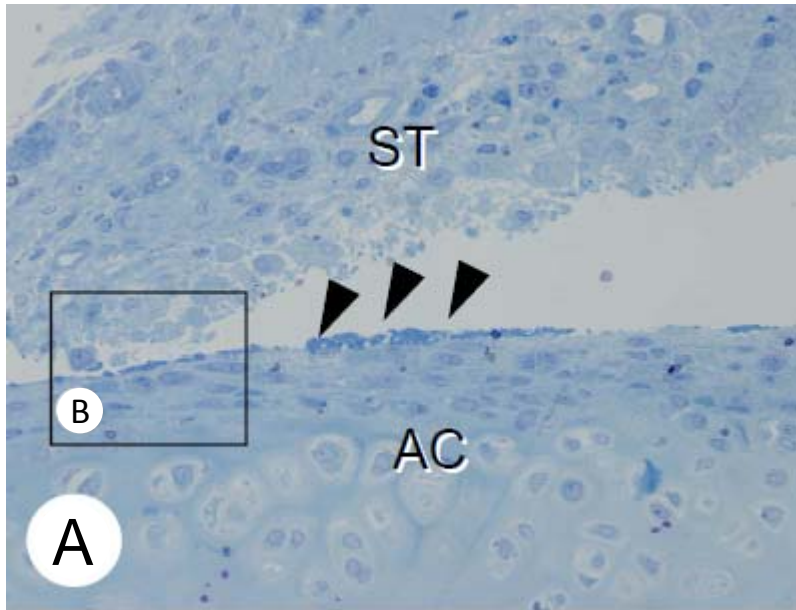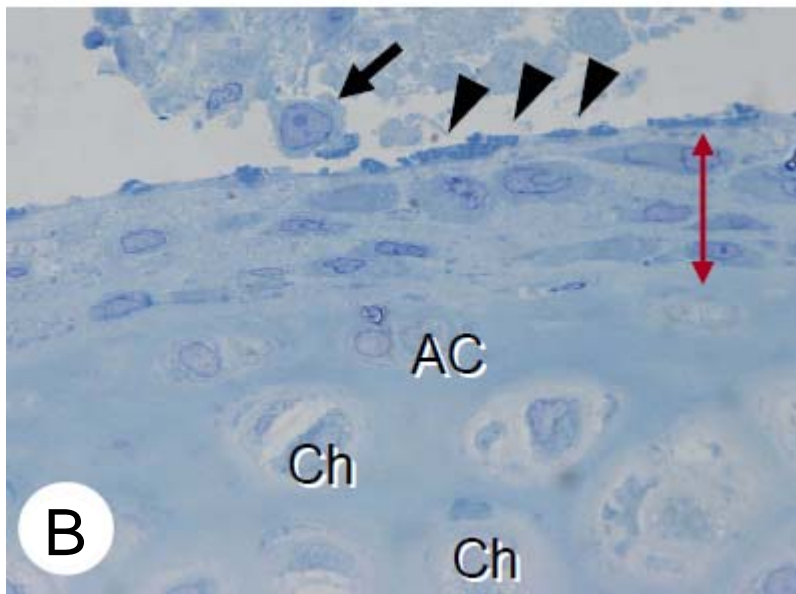

**Supplement Figure.** Light microscopy of articular cartilage surface with moderate joint destruction. The framework of Fig. B was showed in Fig. A. Synovium was thickened, and organic substances were deposited on articulating surface (Arrowheads: A, B). Mononuclear cell was localized into joint space (Arrow: B). Cells in articular surface were not oval chondrocytes but multiple layers of flat cells (Red arrow). AC: articular cartilage ST: synovial tissue Ch: chondrocytes
